# Supplementary material for: Acetoin production by resting cells of Lactococcus lactis for direct electrochemical synthesis of 2-butanone
Source: Royal Society of Chemistry journal article supplement (doi:10.1039/d3gc02513f), 2023-01-01
Supplement: d3gc02513f1.pdf [file d3gc02513f1.pdf]

**Table S1** Chemically defined medium (CDM) by Otto *et al.*<sup>1</sup>

| Substance                                  |                   | Concentration             |
|--------------------------------------------|-------------------|---------------------------|
| Glucose                                    | $C_6H_{12}O_6$    | 10 or 40 $g \cdot L^{-1}$ |
| Dipotassium phosphate                      | $K_2HPO_4$        | 2.5 $g \cdot L^{-1}$      |
| Monopotassium phosphate                    | $KH_2PO_4$        | 3 $g \cdot L^{-1}$        |
| Triammonium citrate                        | $C_6H_{17}N_3O_7$ | 0.6 $g \cdot L^{-1}$      |
| Sodium acetate                             | $C_2H_3NaO_2$     | 1 $g \cdot L^{-1}$        |
| Cysteine hydrochloride                     | $C_3H_8ClNO_2S$   | 0.25 $g \cdot L^{-1}$     |
| Salt-free, vitamin-free casein hydrolysate |                   | 5 $g \cdot L^{-1}$        |
| 100x Vitamin solution                      |                   | 10 $mL \cdot L^{-1}$      |
| 100x Metal solution                        |                   | 10 $mL \cdot L^{-1}$      |
| 100x Nucleic acid bases solution           |                   | 10 $mL \cdot L^{-1}$      |

**Vitamin solution for the CDM by Otto *et al.***

| Substance                  |                               | [ $mg \cdot L^{-1}$ ] |
|----------------------------|-------------------------------|-----------------------|
| Pyridoxine hydrochloride   | $C_8H_{12}ClNO_3$             | 200                   |
| Nicotinic acid             | $C_6H_5NO_2$                  | 100                   |
| Thiamin hydrochloride      | $C_{12}H_{18}Cl_2N_4OS$       | 100                   |
| Riboflavin                 | $C_{17}H_{20}N_4O_6$          | 100                   |
| Calcium D-pantothenate     | $C_{18}H_{32}CaN_2O_{10}$     | 100                   |
| Sodium p-aminobenzoate     | $C_7H_6NNaO_2$                | 1000                  |
| D-biotin                   | $C_{10}H_{16}N_2O_3S$         | 1000                  |
| Folic acid                 | $C_{19}H_{19}N_7O_6$          | 100                   |
| Vitamin B12                | $C_{63}H_{88}CoN_{14}O_{14}P$ | 100                   |
| Orotic acid                | $C_5H_4N_2O_4$                | 500                   |
| 2-deoxythymidine           | $C_{10}H_{14}N_2O_5$          | 500                   |
| Inosine                    | $C_{10}H_{12}N_4O_5$          | 500                   |
| DL-6,8-thioctic acid       | $C_8H_{14}O_2S_2$             | 250                   |
| Pyridoxamine hydrochloride | $C_8H_{13}ClN_2O_2$           | 500                   |

**Metal solution for the CDM by Otto *et al.***

| Substance                      |                      | [ $mg \cdot L^{-1}$ ] |
|--------------------------------|----------------------|-----------------------|
| Magnesium chloride hexahydrate | $MgCl_2 \cdot 6H_2O$ | 20                    |
| Calcium chloride dihydrate     | $CaCl_2 \cdot 2H_2O$ | 5                     |
| Iron chloride tetrahydrate     | $FeCl_2 \cdot 4H_2O$ | 0.5                   |
| Zinc sulfate heptahydrate      | $ZnSO_4 \cdot 7H_2O$ | 0.5                   |
| Cobalt chloride hexahydrate    | $CoCl_2 \cdot 6H_2O$ | 0.25                  |

**Nucleic acid solution for the CDM by Otto *et al.***

| Substance |                | per 10 mL 0.1 M NaOH [g] |
|-----------|----------------|--------------------------|
| Adenine   | $C_5H_5N_5$    | 10                       |
| Uracil    | $C_4H_4N_2O_2$ | 10                       |
| Xanthine  | $C_5H_4N_4O_2$ | 10                       |
| Guanine   | $C_5H_5N_5O$   | 10                       |

### Addition of amino acids in the CDM by Poolman and Konings

| Substance       |                                                               | Concentration [mg·L <sup>-1</sup> ] |
|-----------------|---------------------------------------------------------------|-------------------------------------|
| L-Alanine       | C <sub>3</sub> H <sub>7</sub> NO <sub>2</sub>                 | 240                                 |
| L-Arginine      | C <sub>6</sub> H <sub>14</sub> N <sub>4</sub> O <sub>2</sub>  | 125                                 |
| L-Asparagine    | C <sub>4</sub> H <sub>8</sub> N <sub>2</sub> O <sub>3</sub>   | 350                                 |
| L-Glutamine     | C <sub>5</sub> H <sub>10</sub> N <sub>2</sub> O <sub>3</sub>  | 390                                 |
| Glycine         | C <sub>2</sub> H <sub>5</sub> NO <sub>2</sub>                 | 175                                 |
| L-Histidine     | C <sub>6</sub> H <sub>9</sub> N <sub>3</sub> O <sub>2</sub>   | 150                                 |
| L-Isoleucine    | C <sub>6</sub> H <sub>13</sub> NO <sub>2</sub>                | 210                                 |
| L-Leucine       | C <sub>6</sub> H <sub>13</sub> NO <sub>2</sub>                | 475                                 |
| L-Lysine        | C <sub>6</sub> H <sub>14</sub> N <sub>2</sub> O <sub>2</sub>  | 440                                 |
| L-Methionine    | C <sub>5</sub> H <sub>11</sub> NO <sub>2</sub> S              | 125                                 |
| L-Phenylalanine | C <sub>9</sub> H <sub>11</sub> NO <sub>2</sub>                | 275                                 |
| L-Proline       | C <sub>5</sub> H <sub>9</sub> NO <sub>2</sub>                 | 675                                 |
| L-Serine        | C <sub>3</sub> H <sub>7</sub> NO <sub>3</sub>                 | 340                                 |
| L-Threonine     | C <sub>4</sub> H <sub>9</sub> NO <sub>3</sub>                 | 225                                 |
| L-Tryptophan    | C <sub>11</sub> H <sub>12</sub> N <sub>2</sub> O <sub>2</sub> | 50                                  |
| L-Tyrosine      | C <sub>9</sub> H <sub>11</sub> NO <sub>3</sub>                | 200                                 |
| L-Valine        | C <sub>5</sub> H <sub>11</sub> NO <sub>2</sub>                | 325                                 |

**Table S2** CDMPC medium<sup>2</sup>

Price *et al.* developed a chemically defined medium for prolonged cultivation (CDMPC) of *L. lactis*. The amino acid, metal, vitamin, and alkaline solutions were prepared as stock solutions. After the addition of all components and stock solutions, the medium was sterilized via filtration. Detailed instructions for the preparation are provided by the authors.

### Composition of the CDMPC

| Substance               |                                               | Concentration              |
|-------------------------|-----------------------------------------------|----------------------------|
| Glucose                 | C <sub>6</sub> H <sub>12</sub> O <sub>6</sub> | 10 or 40 g·L <sup>-1</sup> |
| Potassium phosphate     | KH <sub>2</sub> PO <sub>4</sub>               | 2.75 g·L <sup>-1</sup>     |
| Sodium Chloride         | NaCl                                          | 2.90 g·L <sup>-1</sup>     |
| Sodium phosphate        | NaH <sub>2</sub> PO <sub>4</sub>              | 2.85 g·L <sup>-1</sup>     |
| 10x amino acid solution |                                               | 100 mL·L <sup>-1</sup>     |
| 100x metal solution     |                                               | 10 mL·L <sup>-1</sup>      |
| 100x vitamin solution   |                                               | 10 mL·L <sup>-1</sup>      |
| 100x alkaline solution  |                                               | 10 mL·L <sup>-1</sup>      |

### 10x amino acid solution for the CDMPC

| Substance                            |                                                                      | Concentration [g·L <sup>-1</sup> ] |
|--------------------------------------|----------------------------------------------------------------------|------------------------------------|
| L-Alanine                            | C <sub>3</sub> H <sub>7</sub> NO <sub>2</sub>                        | 1.3                                |
| L-Arginine                           | C <sub>6</sub> H <sub>14</sub> N <sub>4</sub> O <sub>2</sub>         | 2.44                               |
| L-Asparagine                         | C <sub>4</sub> H <sub>8</sub> N <sub>2</sub> O <sub>3</sub>          | 0.8                                |
| L-Aspartic acid                      | C <sub>4</sub> H <sub>7</sub> NO <sub>4</sub>                        | 1.37                               |
| L-Cysteine hydrochloride monohydrate | C <sub>3</sub> H <sub>7</sub> NO <sub>2</sub> S HCl H <sub>2</sub> O | 0.61                               |
| L-Glutamic acid                      | C <sub>5</sub> H <sub>9</sub> NO <sub>4</sub>                        | 0.97                               |

|                            |                       |      |
|----------------------------|-----------------------|------|
| L-Glutamine                | $C_5H_{10}N_2O_3$     | 0.96 |
| Glycine                    | $C_2H_5NO_2$          | 0.29 |
| L-Histidine                | $C_6H_9N_3O_2$        | 0.24 |
| L-Isoleucine               | $C_6H_{13}NO_2$       | 0.82 |
| L-Leucine                  | $C_6H_{13}NO_2$       | 1.17 |
| L-Lysine monohydrochloride | $C_6H_{14}N_2O_2$ HCl | 1.87 |
| L-Methionine               | $C_5H_{11}NO_2S$      | 0.38 |
| L-Phenylalanine            | $C_9H_{11}NO_2$       | 0.64 |
| L-Proline                  | $C_5H_9NO_2$          | 4.12 |
| L-Serine                   | $C_3H_7NO_3$          | 1.72 |
| L-Threonine                | $C_4H_9NO_3$          | 0.68 |
| L-Tryptophan               | $C_{11}H_{12}N_2O_2$  | 0.36 |
| L-Valine                   | $C_5H_{11}NO_2$       | 0.86 |

### 100x metal solution for the CDMPC

| Substance                       | Molecular formula                | Concentration | [mg·L <sup>-1</sup> ] |
|---------------------------------|----------------------------------|---------------|-----------------------|
| Ammonium molybdate tetrahydrate | $(NH_4)_6Mo_7O_{24} \cdot 4H_2O$ |               | 30                    |
| Calcium chloride dihydrate      | $CaCl_2 \cdot 2H_2O$             |               | 300                   |
| Cobalt sulfate heptahydrate     | $CoSO_4 \cdot 7H_2O$             |               | 30                    |
| Copper sulfate pentahydrate     | $CuSO_4 \cdot 5H_2O$             |               | 30                    |
| Iron chloride tetrahydrate      | $FeCl_2 \cdot 4H_2O$             |               | 400                   |
| Magnesium chloride hexahydrate  | $MgCl_2 \cdot 6H_2O$             |               | 20,000                |
| Manganese chloride tetrahydrate | $MnCl_2 \cdot 4H_2O$             |               | 400                   |
| Zinc sulfate heptahydrate       | $ZnSO_4 \cdot 7H_2O$             |               | 30                    |

### 100x vitamin solution for the CDMPC

| Substance                           |                           |  | [mg·L <sup>-1</sup> ] |
|-------------------------------------|---------------------------|--|-----------------------|
| $\alpha$ -Lipoic acid               | $C_8H_{14}O_2S_2$         |  | 200                   |
| D-Pantothenic acid hemicalcium salt | $C_9H_{16}NO_5$ 1/2 Ca    |  | 50                    |
| Nicotinic acid                      | $C_6H_5NO_2$              |  | 100                   |
| Pyridoxal hydrochloride             | $C_8H_9NO_3$ HCl          |  | 100                   |
| Pyridoxine hydrochloride            | $C_8H_{11}NO_3$ HCl       |  | 100                   |
| Thiamine hydrochloride              | $C_{12}H_{17}ClN_4OS$ HCl |  | 100                   |

### 100x alkaline solution for the CDMPC

| Substance  |                       |  | [mg·L <sup>-1</sup> ] |
|------------|-----------------------|--|-----------------------|
| Biotin     | $C_{10}H_{16}N_2O_3S$ |  | 10                    |
| L-Tyrosine | $C_9H_{11}NO_3$       |  | 5000                  |

**Table S3** Resting cell buffer

Resting cell experiments were conducted in a buffer solution. The phosphate buffer, trace elements, and magnesium solution were prepared as individual stock solutions in 100x concentration. The glucose solution was prepared as a 500 g·L<sup>-1</sup> stock solution. All stock solutions were autoclaved except for the trace element solution which was sterile filtered. For the preparation of the washing buffer, used for the washing step during resting cell experiments, glucose was omitted.

## Composition of the resting cell buffer

### Phosphate buffer

|                       |             |                                    |
|-----------------------|-------------|------------------------------------|
| Dipotassium phosphate | $K_2HPO_4$  | $3.88 \text{ g}\cdot\text{L}^{-1}$ |
| Monosodium phosphate  | $NaH_2PO_4$ | $1.63 \text{ g}\cdot\text{L}^{-1}$ |
| Magnesium sulfate     | $MgSO_4$    | $0.25 \text{ g}\cdot\text{L}^{-1}$ |

### Trace elements

|                                |                         |                                    |
|--------------------------------|-------------------------|------------------------------------|
| EDTA                           | $C_{10}H_{16}N_2O_8$    | $10 \text{ mg}\cdot\text{L}^{-1}$  |
| Magnesium chloride hexahydrate | $MgCl_2 \cdot 6H_2O$    | $0.10 \text{ g}\cdot\text{L}^{-1}$ |
| Zinc sulfate heptahydrate      | $ZnSO_4 \cdot 7H_2O$    | $2 \text{ mg}\cdot\text{L}^{-1}$   |
| Calcium chloride dihydrate     | $CaCl_2 \cdot 2H_2O$    | $1 \text{ mg}\cdot\text{L}^{-1}$   |
| Iron sulfate heptahydrate      | $FeSO_4 \cdot 7H_2O$    | $5 \text{ mg}\cdot\text{L}^{-1}$   |
| Sodium molybdate dihydrate     | $Na_2MoO_4 \cdot 2H_2O$ | $0.2 \text{ mg}\cdot\text{L}^{-1}$ |
| Copper sulfate pentahydrate    | $CuSO_4 \cdot 5H_2O$    | $0.2 \text{ mg}\cdot\text{L}^{-1}$ |
| Cobalt chloride hexahydrate    | $CoCl_2 \cdot 6H_2O$    | $0.4 \text{ mg}\cdot\text{L}^{-1}$ |
| Manganese chloride dihydrate   | $MnCl_2 \cdot 2H_2O$    | $1 \text{ mg}\cdot\text{L}^{-1}$   |
| Carbon source glucose          | $C_6H_{12}O_6$          | $40 \text{ g}\cdot\text{L}^{-1}$   |

**Table S4** Variation of filling volume in 500 mL shake flasks to vary the oxygen transfer for cultivations of *L. lactis* VJ017 and the corresponding process parameters. <sup>a</sup>The oxygen transfer rate was calculated according to Meier *et al*<sup>3</sup>.

| Filling volume [mL] | Glucose concentration [ $\text{g}\cdot\text{L}^{-1}$ ] | OTR [ $\text{mmol}\cdot\text{L}^{-1}\cdot\text{h}^{-1}$ ] <sup>a</sup> | Acetoin titer [ $\text{g}\cdot\text{L}^{-1}$ ] | Acetoin yield [ $\text{g}_{\text{acetoin}}^{-1}\cdot\text{g}_{\text{glucose}}^{-1}$ ] | Specific acetoin yield [ $\text{g}_{\text{acetoin}}^{-1}\cdot\text{g}_{\text{CDW}}^{-1}$ ] |
|---------------------|--------------------------------------------------------|------------------------------------------------------------------------|------------------------------------------------|---------------------------------------------------------------------------------------|--------------------------------------------------------------------------------------------|
| 50                  | 40                                                     | 28.62                                                                  | $13.8 \pm 0.1$                                 | $0.35 \pm 0.0$                                                                        | $2.26 \pm 0.03$                                                                            |
| 25                  | 40                                                     | 47.80                                                                  | $16.5 \pm 0.3$                                 | $0.41 \pm 0.01$                                                                       | $2.97 \pm 0.16$                                                                            |
| 25                  | 10                                                     | 47.80                                                                  | $4.8 \pm 0.1$                                  | $0.48 \pm 0.00$                                                                       | $1.85 \pm 0.13$                                                                            |

**Table S5** Acetoin concentration in the respective media and applied current densities for electrochemical conversion of acetoin to 2-butanone.

| Medium              | Concentration [ $\text{g}\cdot\text{L}^{-1}$ ] | Current Density [ $\text{mA}\cdot\text{cm}^{-2}$ ] |
|---------------------|------------------------------------------------|----------------------------------------------------|
| M17                 | 6                                              | 10                                                 |
| HS                  | 7                                              | 10                                                 |
| LB                  | 8                                              | 10                                                 |
| YEP                 | 14                                             | 25                                                 |
| M17                 | 16                                             | 25                                                 |
| Resting cell buffer | 19                                             | 25                                                 |

1. R. Otto, B. ten Brink, H. Veldkamp and W. N. Konings, *FEMS Microbiology Letters*, 1983, **16**, 69-74.
2. C. E. Price, F. Branco dos Santos, A. Hesseling, J. J. Uusitalo, H. Bachmann, V. Benavente, A. Goel, J. Berkhout, F. J. Bruggeman, S.-J. Marrink, M. Montalban-Lopez, A. de Jong, J. Kok, D. Molenaar, B. Poolman, B. Teusink and O. P. Kuipers, *BMC Evolutionary Biology*, 2019, **19**, 15.
3. K. Meier, W. Klöckner, B. Bonhage, E. Antonov, L. Regestein and J. Büchs, *Biochemical Engineering Journal*, 2016, **109**, 228-235.
